# Supplementary material
Source: PubMed Central journal article supplement (PMC3761391)
Supplement: NIHMS506624-supplement-1_si_001.pdf [file NIHMS506624-supplement-1_si_001.pdf]

*Supporting Information for*

**Hydrolysis Reactions of the Taccalonolides Reveal Structure Activity Relationships**

Jing Li,<sup>†‡</sup> Jiangnan Peng,<sup>†‡</sup> April L. Risinger,<sup>†‡</sup> and Susan L. Mooberry<sup>†‡\*</sup>

<sup>†</sup>Department of Pharmacology, <sup>‡</sup>Cancer Therapy & Research Center, University of Texas Health Science Center at San Antonio, Texas, 78229, USA

[Mooberry@uthscsa.edu](mailto:Mooberry@uthscsa.edu)

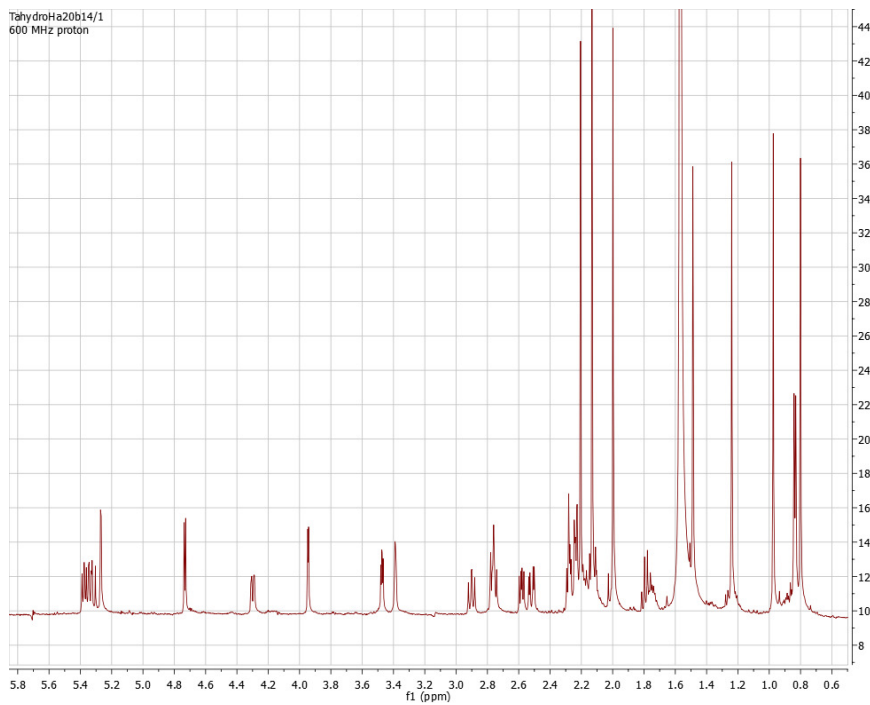

S1.  $^1\text{H}$  NMR (600 MHz,  $\text{CDCl}_3$ ) spectrum of the new compound **1**

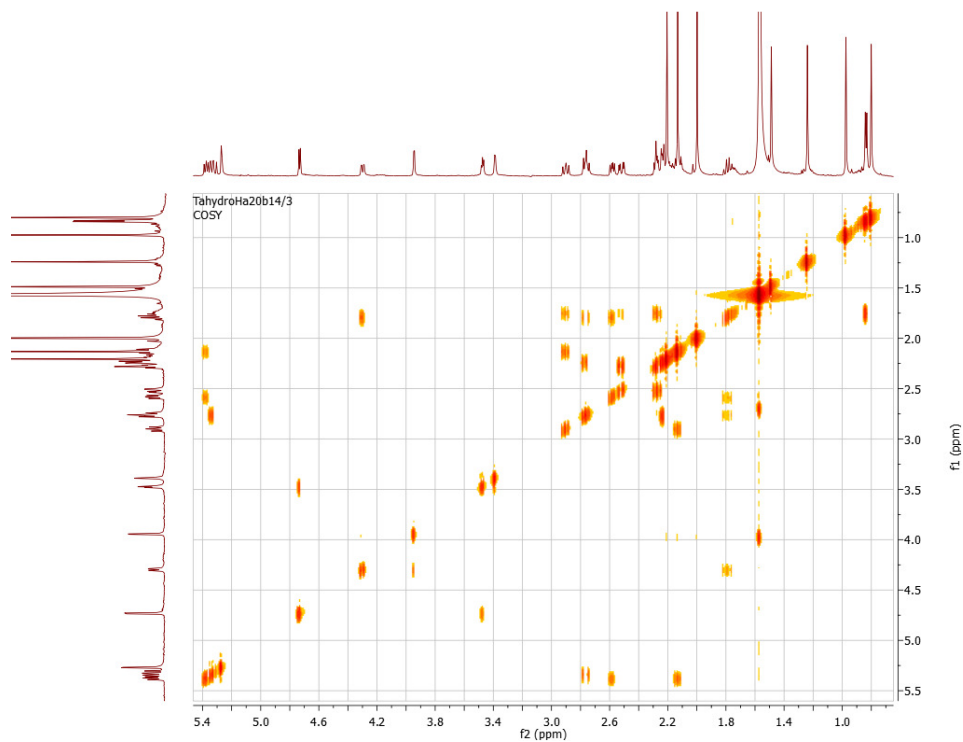

S2. COSY (600 MHz,  $\text{CDCl}_3$ ) spectrum of the new compound **1**

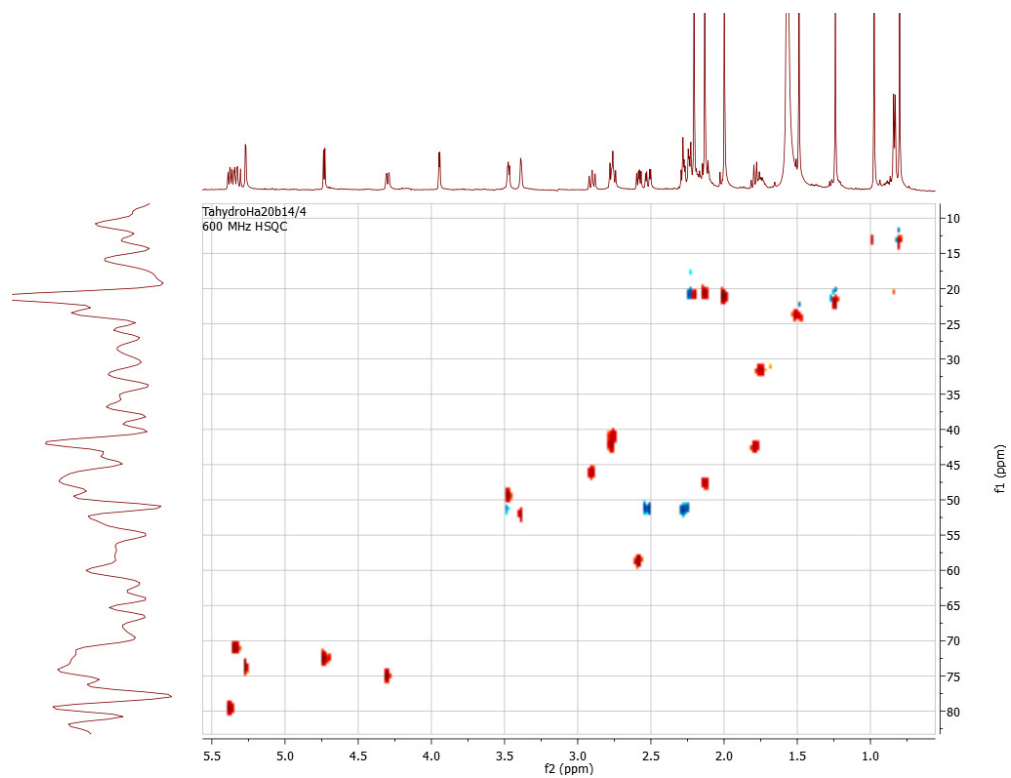

S3. HSQC (600 MHz,  $\text{CDCl}_3$ ) spectrum of the new compound **1**

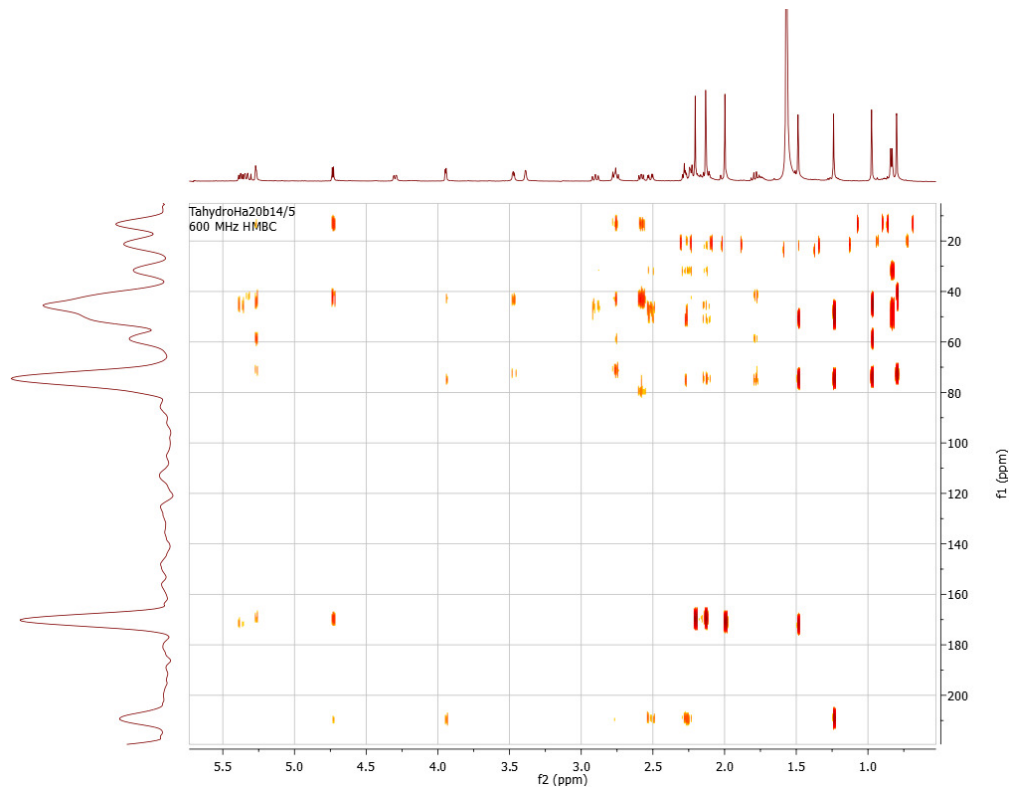

S4. HMBC (600 MHz,  $\text{CDCl}_3$ ) spectrum of the new compound **1**

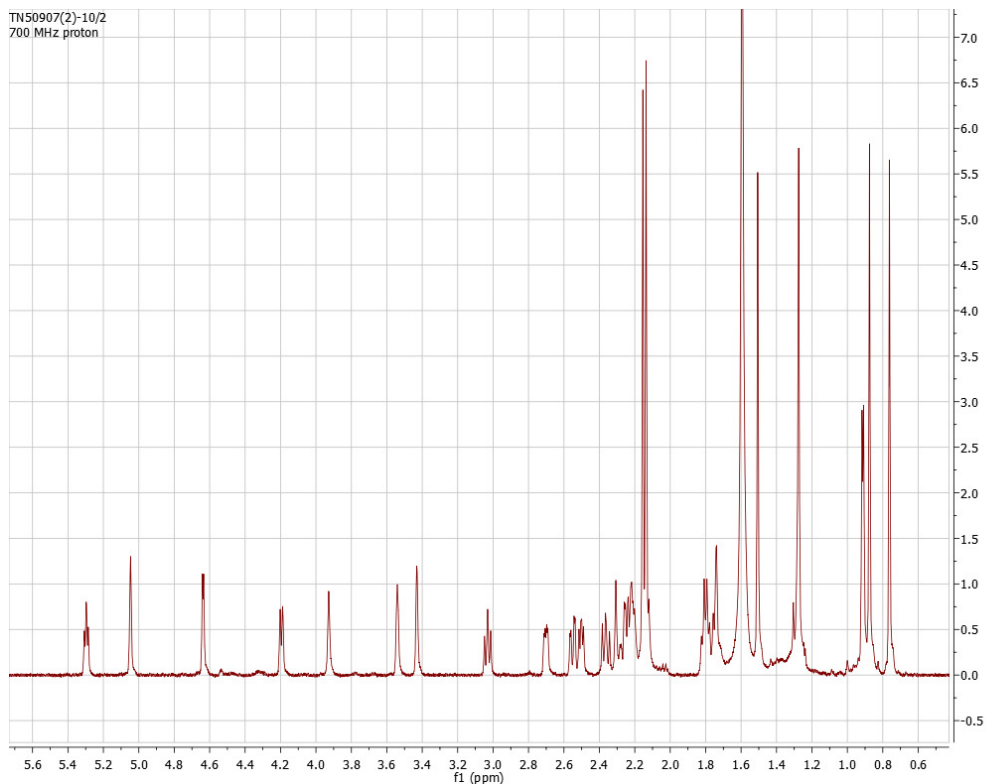

S5.  $^1\text{H}$  NMR (700 MHz,  $\text{CDCl}_3$ ) spectrum of the new compound **2**

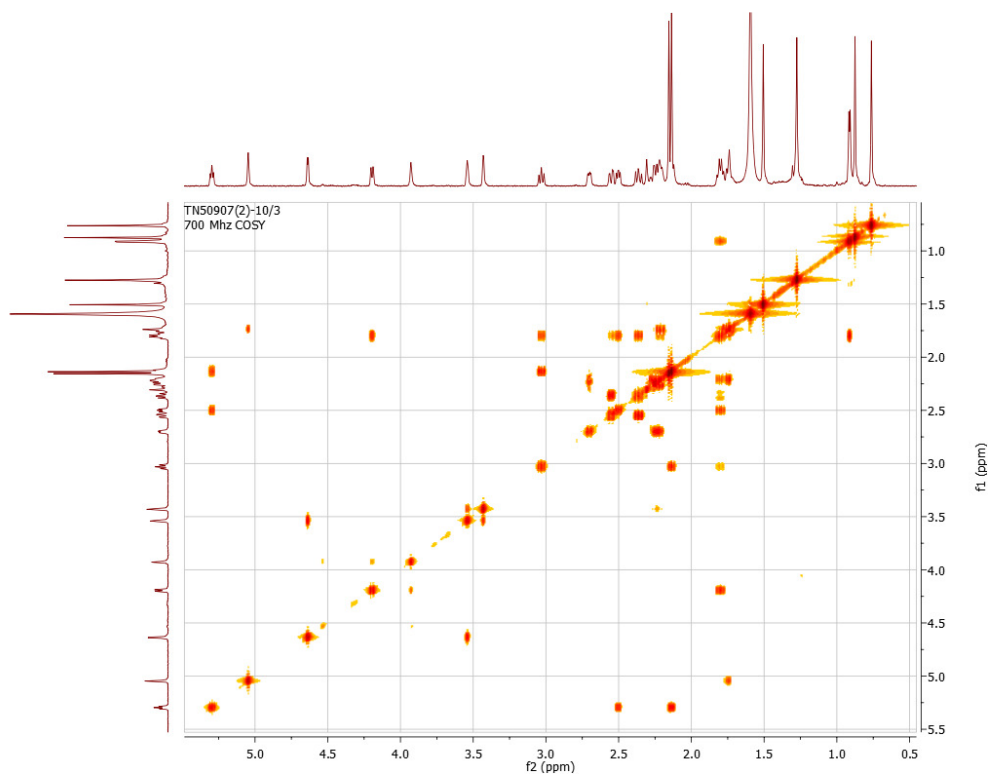

S6. COSY (700 MHz,  $\text{CDCl}_3$ ) spectrum of the new compound **2**

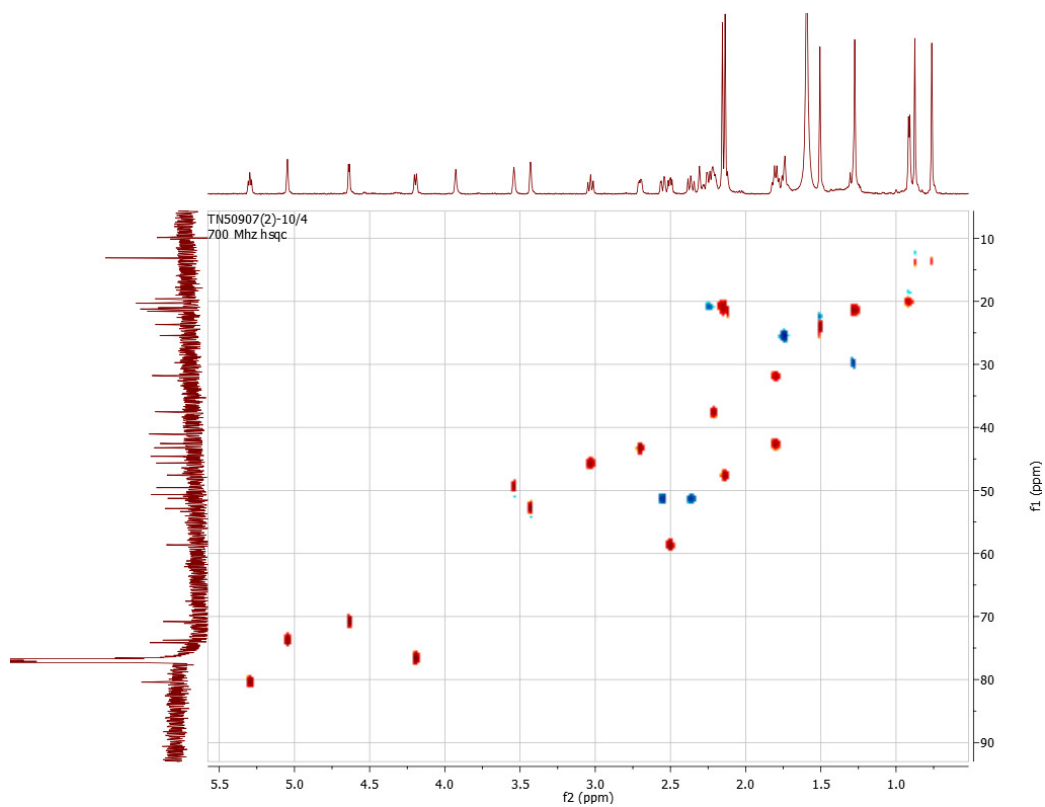

S7. HSQC (700 MHz, CDCl<sub>3</sub>) spectrum of the new compound **2**

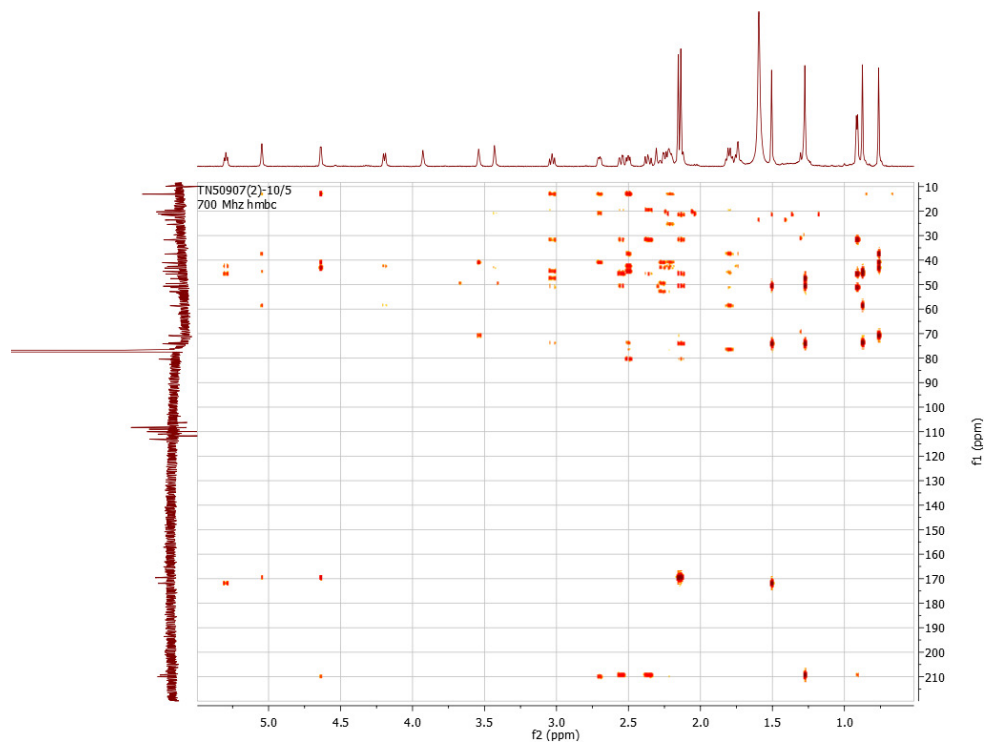

S8. HMBC (700 MHz, CDCl<sub>3</sub>) spectrum of the new compound **2**

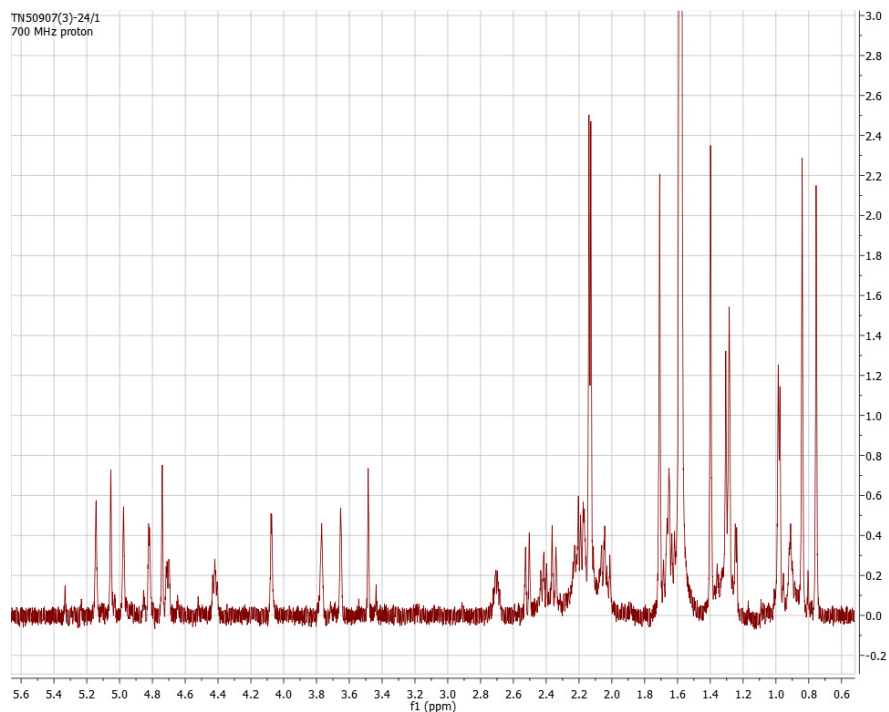

S9.  $^1\text{H}$  NMR (700 MHz,  $\text{CDCl}_3$ ) spectrum of the new compound **3**

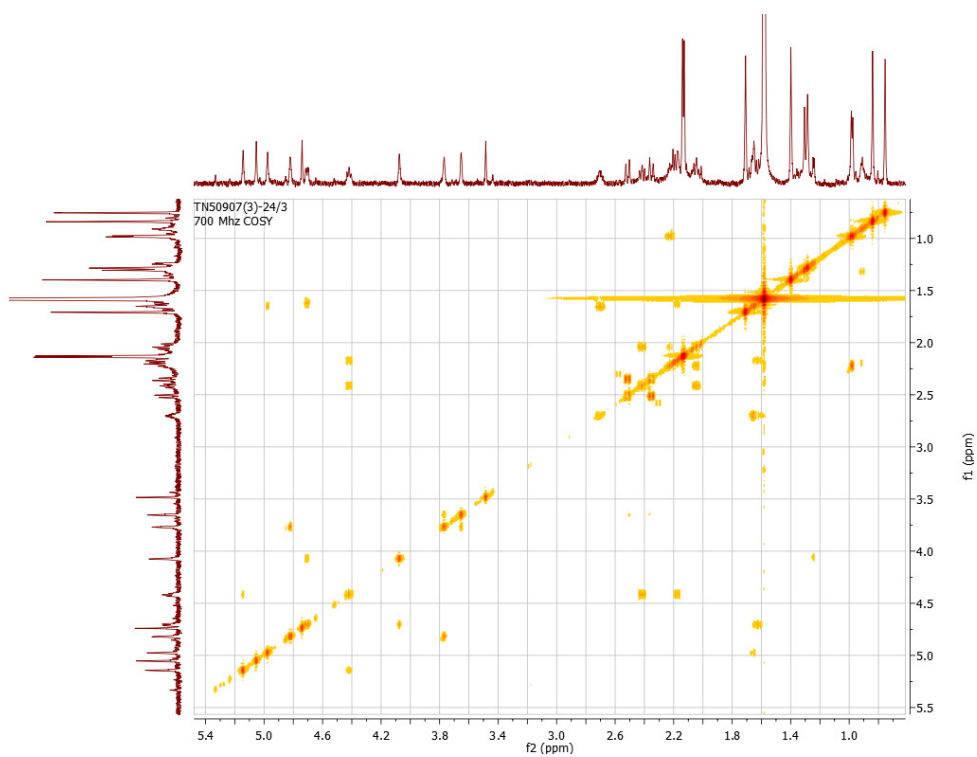

S10. COSY (700 MHz,  $\text{CDCl}_3$ ) spectrum of the new compound **3**

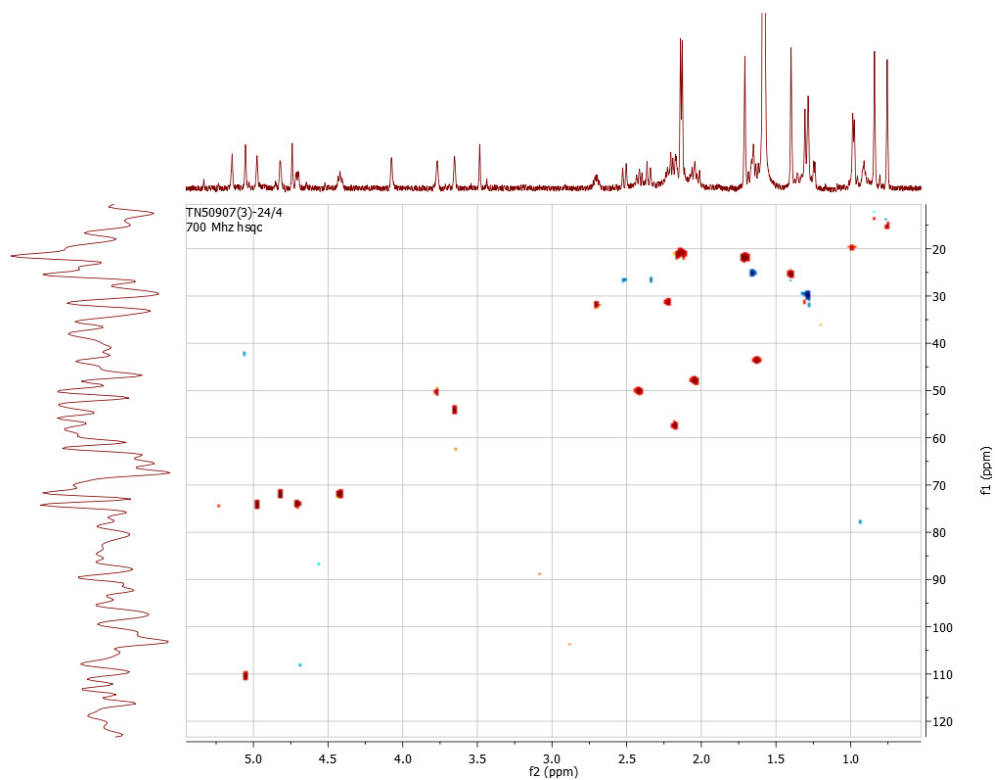

S11. HSQC (700 MHz, CDCl<sub>3</sub>) spectrum of the new compound **3**

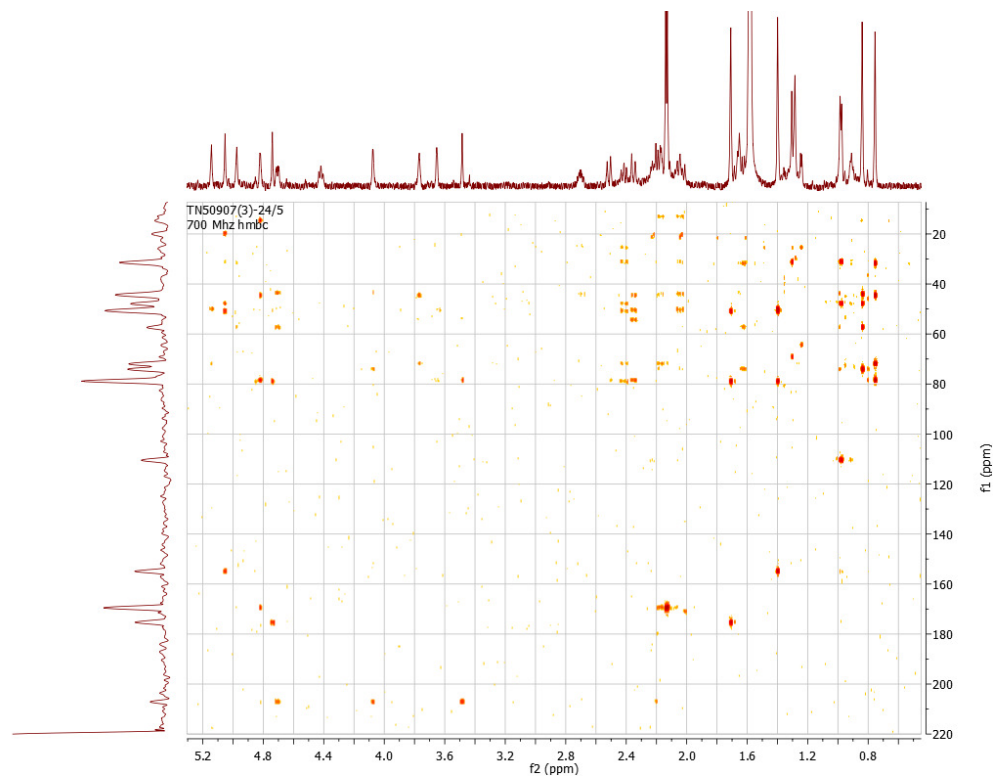

S12. HMBC (700 MHz, CDCl<sub>3</sub>) spectrum of the new compound **3**

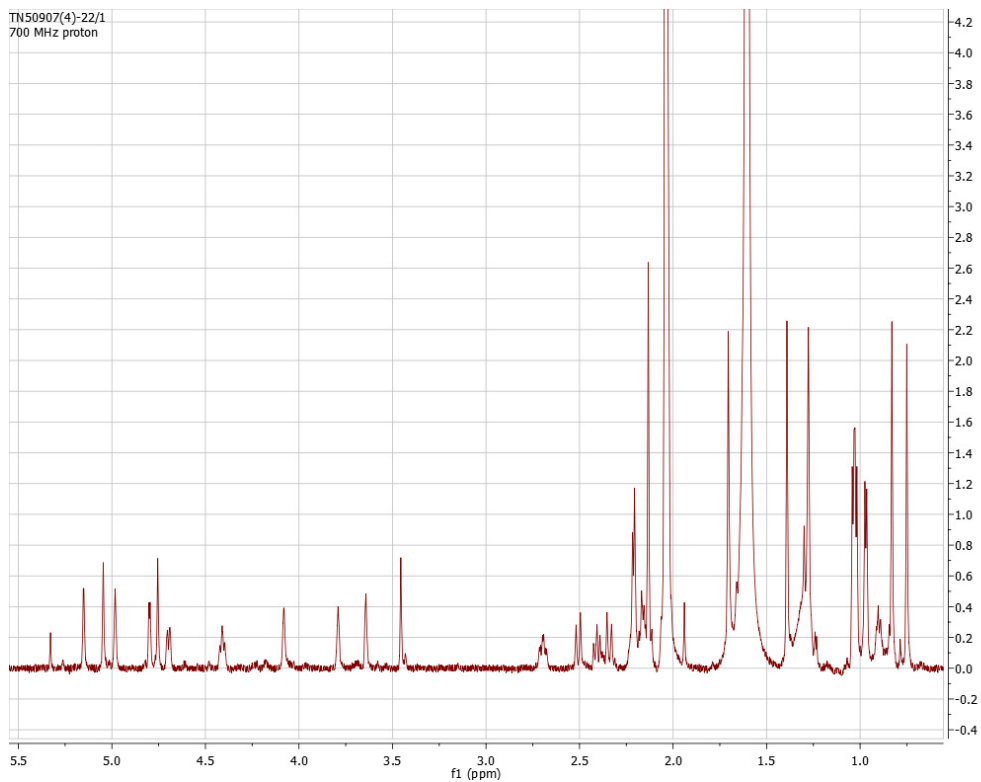

S13.  $^1\text{H}$  NMR (700 MHz,  $\text{CDCl}_3$ ) spectrum of the new compound **4**

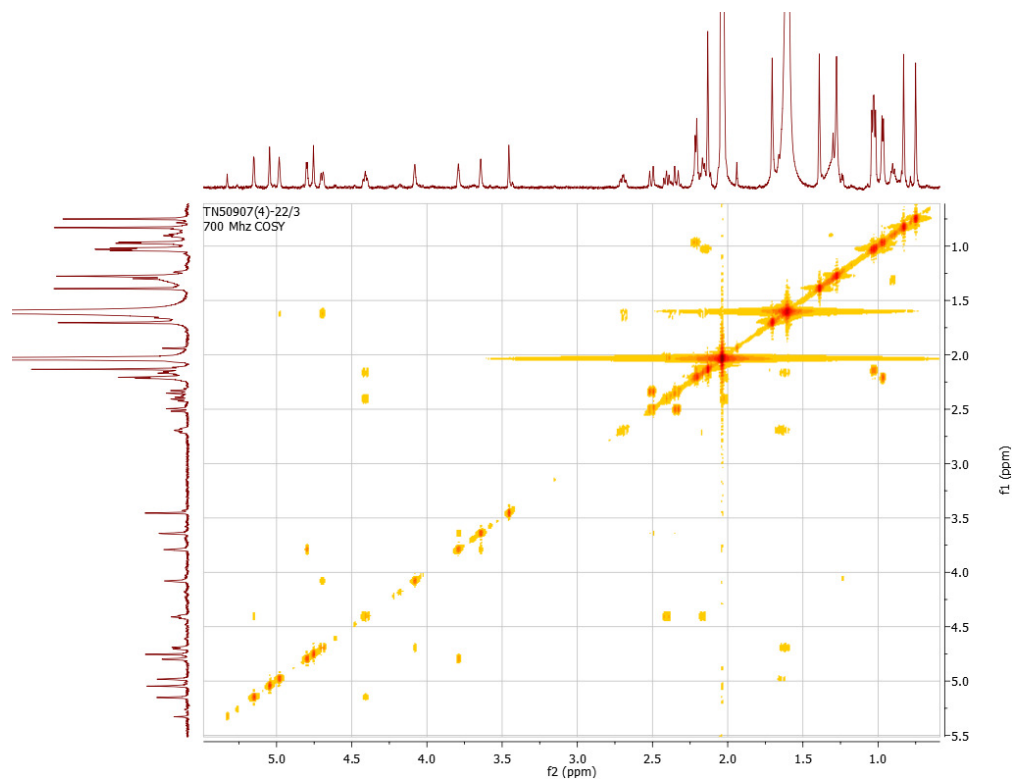

S14. COSY (700 MHz,  $\text{CDCl}_3$ ) spectrum of the new compound **4**



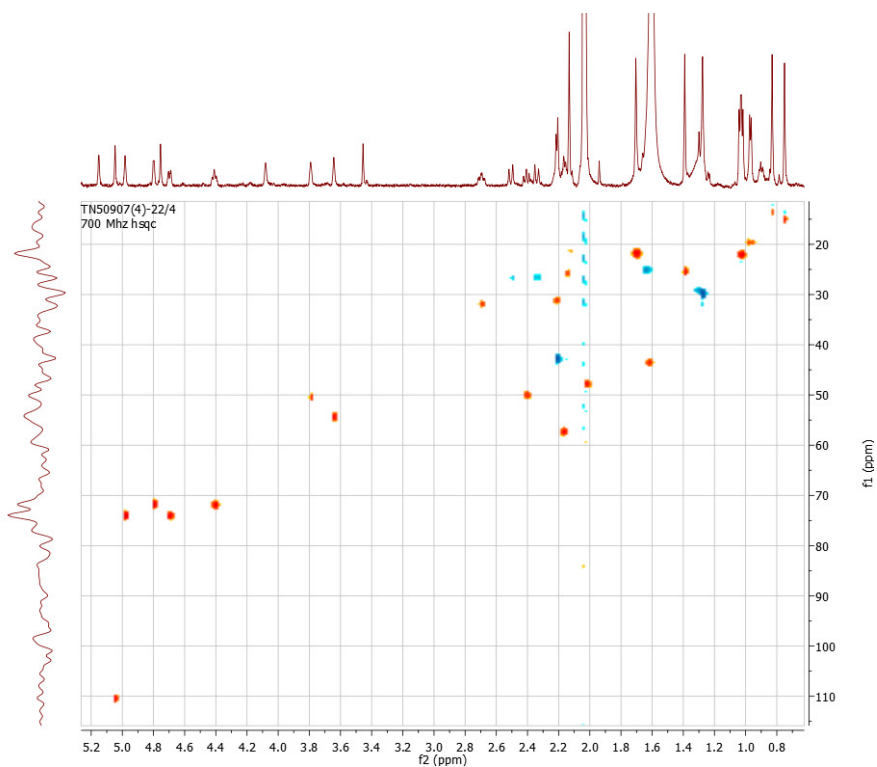

S15. HSQC (700 MHz, CDCl<sub>3</sub>) spectrum of the new compound **4**

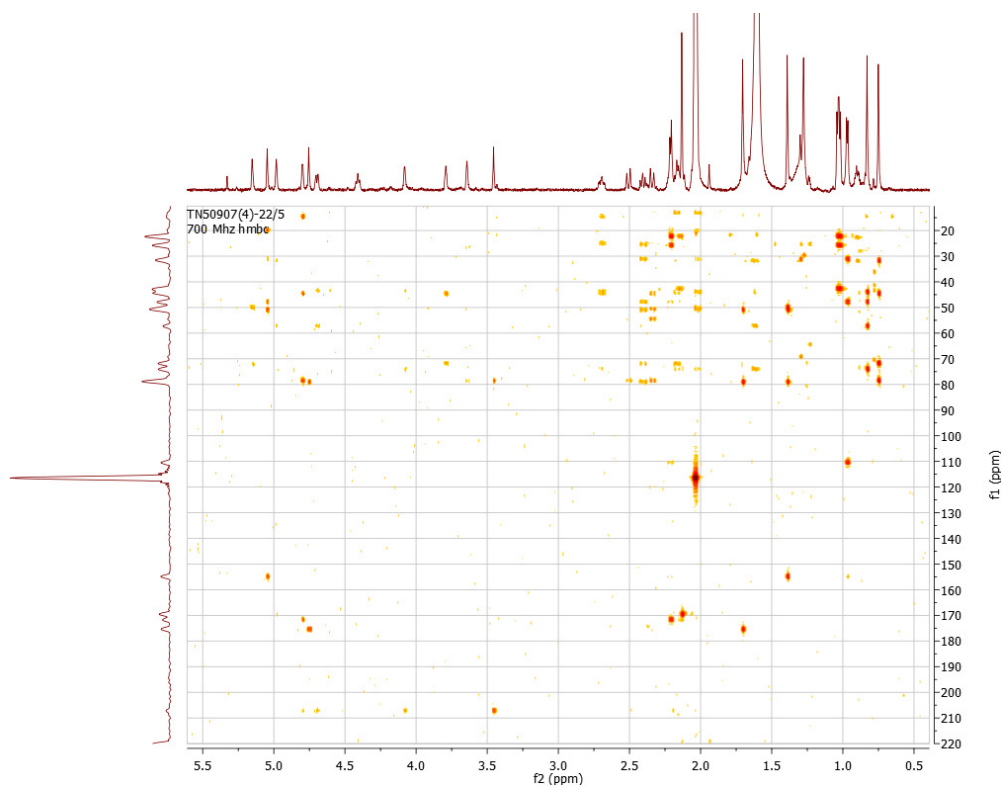

S16. HMBC (700 MHz, CDCl<sub>3</sub>) spectrum of the new compound **4**

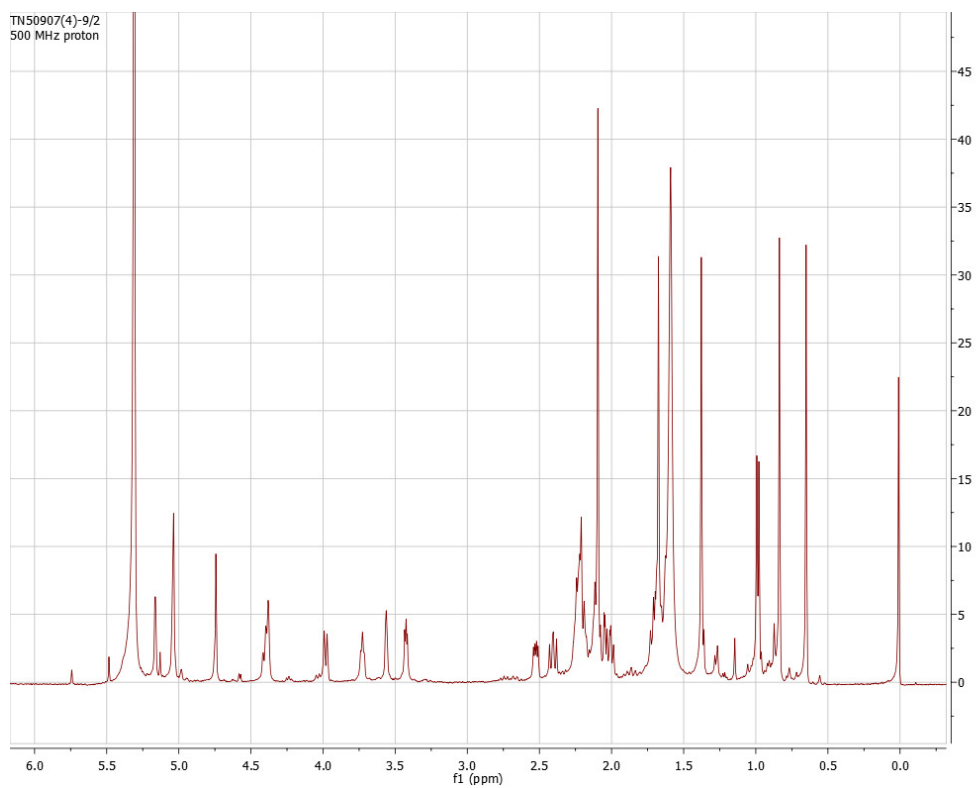

S17.  $^1\text{H}$  NMR (500 MHz,  $\text{CDCl}_3$ ) spectrum of the new compound **5**

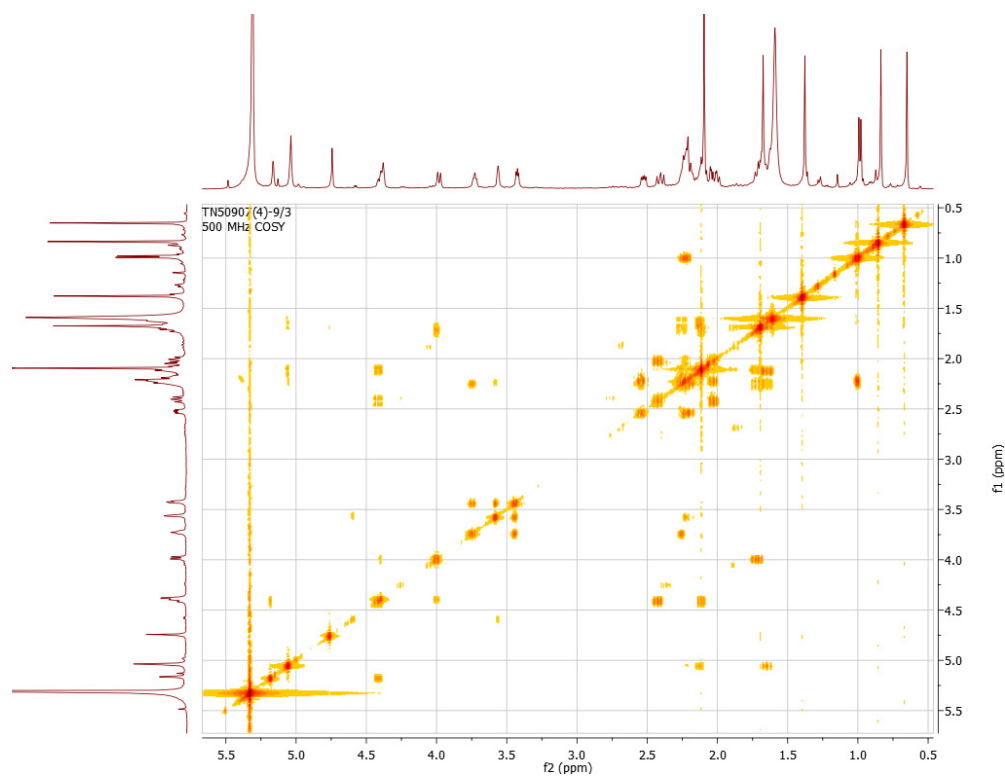

S18. COSY (500 MHz,  $\text{CDCl}_3$ ) spectrum of the new compound **5**

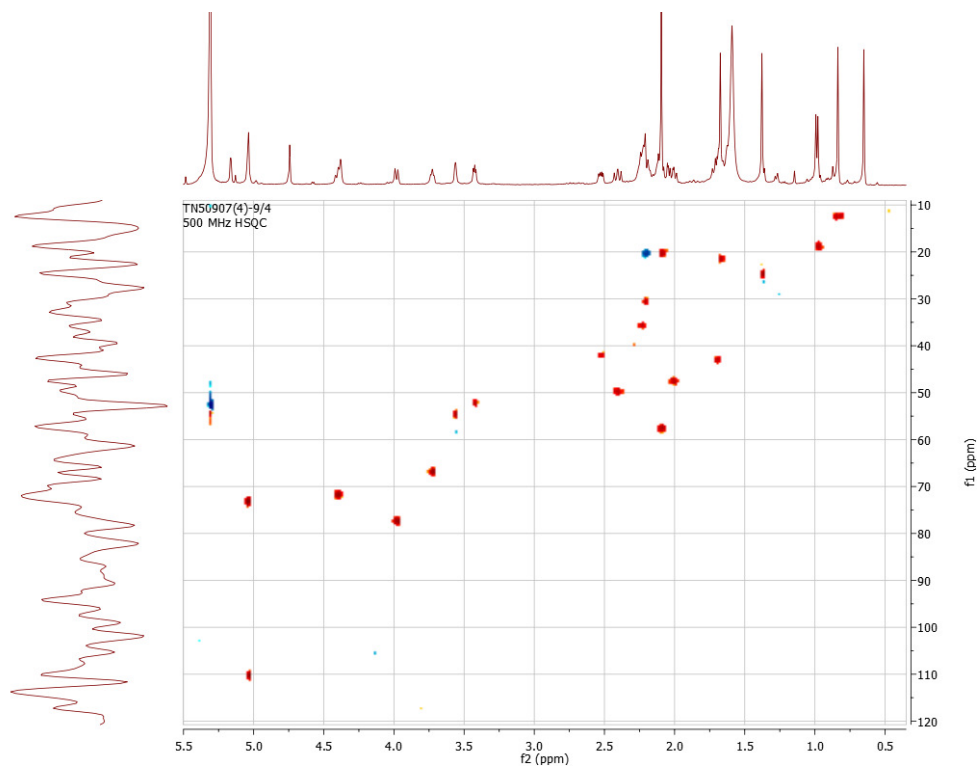

S19. HSQC (500 MHz, CDCl<sub>3</sub>) spectrum of the new compound **5**

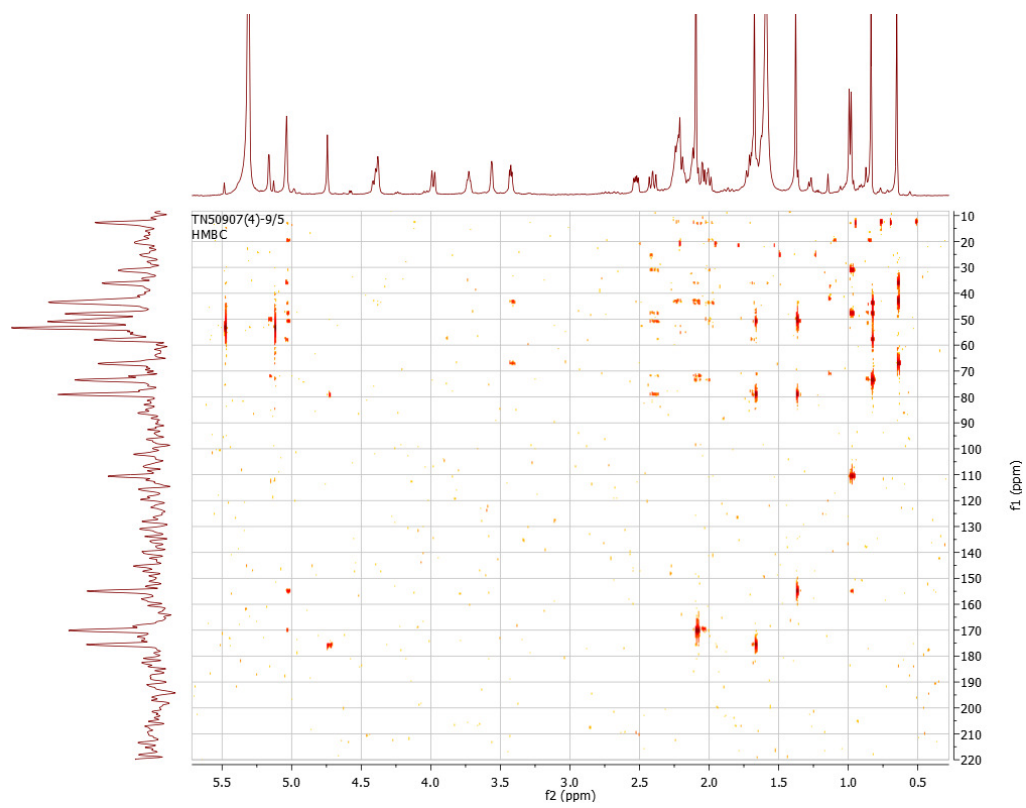

S20. HMBC (500 MHz, CDCl<sub>3</sub>) spectrum of the new compound **5**
